# Supplementary material for: Identification of NCAPG as an Essential Gene for Neuroblastoma Employing CRISPR-Cas9 Screening Database and Experimental Verification
Source: Int J Mol Sci. 2023 Oct 6;24(19):14946. doi: 10.3390/ijms241914946 (PMC10573393; doi:10.3390/ijms241914946)
Supplement: Supplementary file 1 [file ijms-24-14946-s001.zip › Figure S3.pdf]

## Training dataset

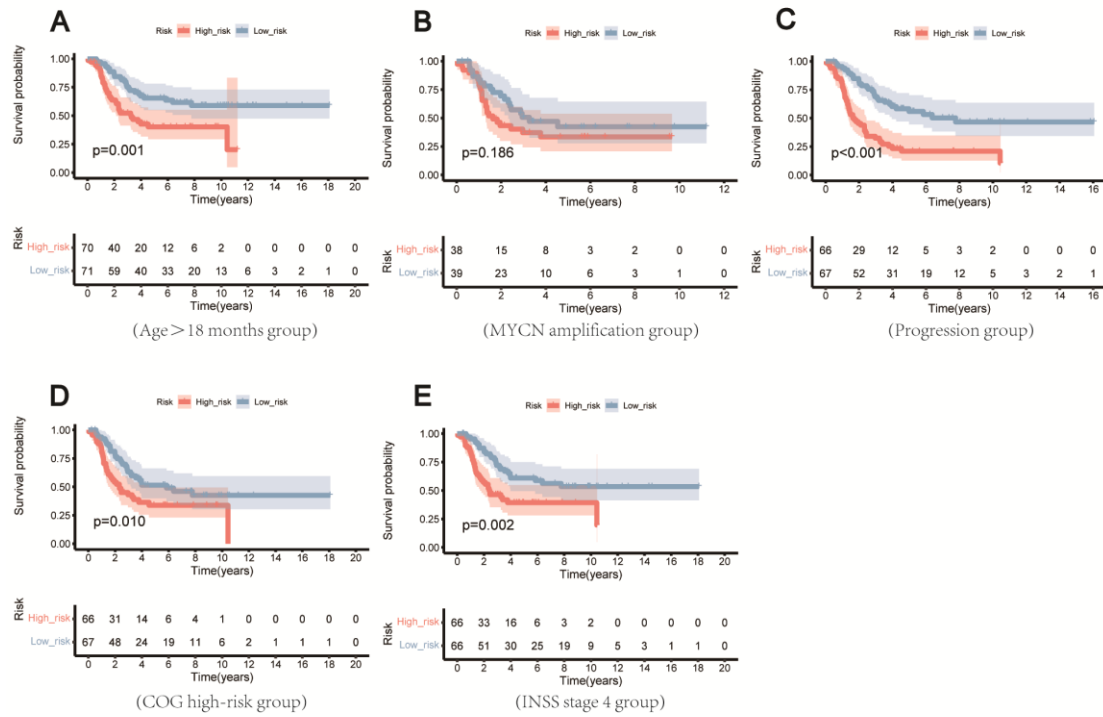

## Internal validation dataset

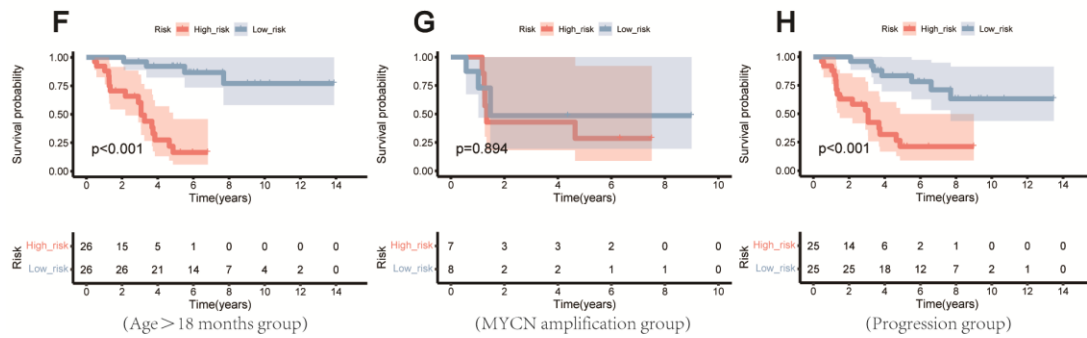

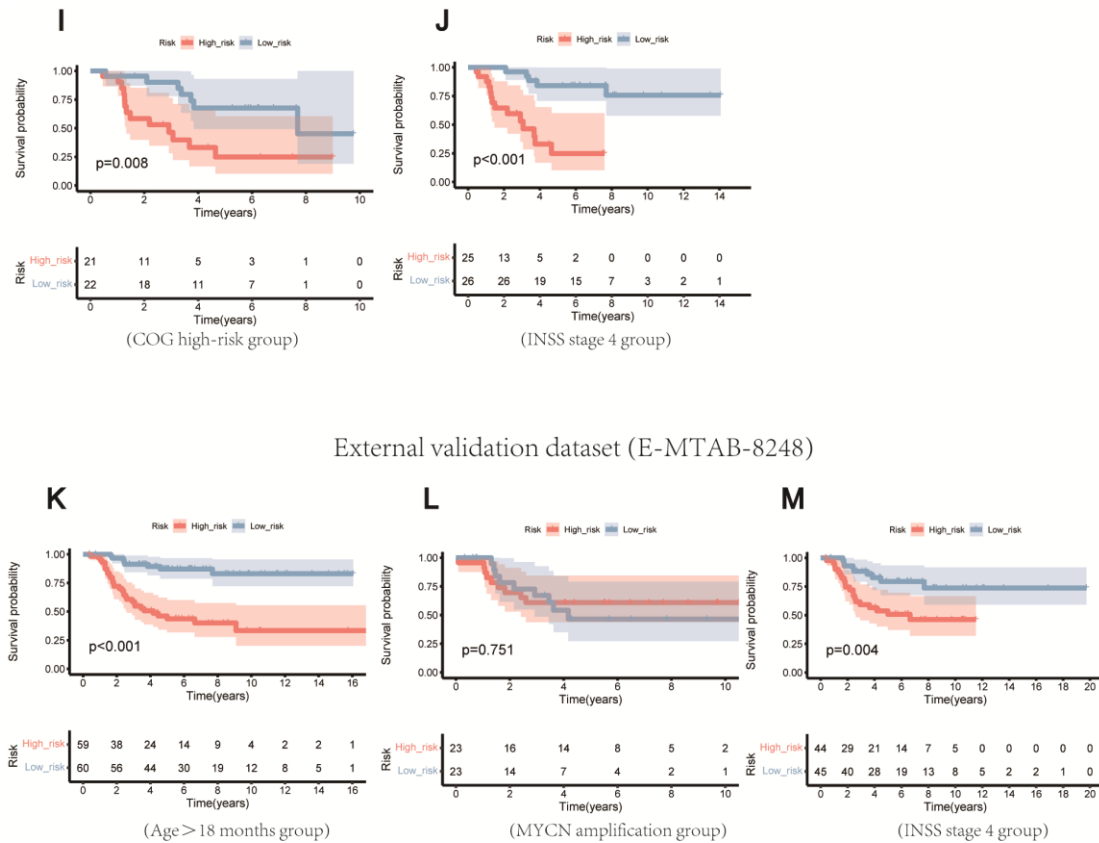

**Figure S3.** The prognostic value of the risk signature in samples with unfavorable characteristics. (A-E) The Kaplan–Meier curve of the risk signature in patients with age > 18 months (A), MYCN amplification (B), progression (C), COG high-risk group (D), and INSS stage 4 (E), in the training dataset. (F-J) The Kaplan–Meier curve of the risk signature in patients with age > 18 months (F), MYCN amplification (G), progression (H), COG high-risk group (I), and INSS stage 4 (J), in the internal validation dataset. (K-M) The Kaplan–Meier curve of the risk signature in patients with age > 18 months (K), MYCN amplification (L), and INSS stage 4 (M), in the external validation dataset.
