# Supplementary material for: Identification of NCAPG as an Essential Gene for Neuroblastoma Employing CRISPR-Cas9 Screening Database and Experimental Verification
Source: Int J Mol Sci. 2023 Oct 6;24(19):14946. doi: 10.3390/ijms241914946 (PMC10573393; doi:10.3390/ijms241914946)
Supplement: Supplementary file 1 [file ijms-24-14946-s001.zip › Table S1.csv]

ID	symbol	ID	symbol	ID	symbol	ID	symbol	ID	symbol	ID	symbol	ID	symbol	ID	symbol	ID	symbol	ID	symbol	ID	symbol	ID	symbol	ID	symbol
1	BUB3	51	POLE	101	POLR2I	151	SF3A1	201	RPS21	251	CDT1	301	EXOSC6	351	SRP9	401	WDR33	451	RPS11	501	BANF1	551	RFC5	601	PSMA1
2	MCM6	52	RPL14	102	MAD2L1	152	POLR2H	202	USPL1	252	SF3B4	302	CHERP	352	SUPT5H	402	INCENP	452	RAD21	502	FARSA	552	NXF1	602	DHX37
3	PSMD3	53	SLC39A7	103	CPSF3	153	LSM4	203	TIMELESS	253	HNRNPH1	303	PSMC5	353	DDX41	403	NUF2	453	RPL6	503	EP400	553	NCAPG	603	ANAPC11
4	RPP21	54	RPL32	104	PAFAH1B1	154	RPS12	204	RPL3	254	DONSON	304	PSMA7	354	ISCU	404	PSMA5	454	AURKA	504	ZNF131	554	PFDN2	604	TINF2
5	PSMC6	55	RNPS1	105	GTF2B	155	EEF1A1	205	RPS29	255	PSMA4	305	RPL12	355	EXOSC2	405	DPH3	455	RBM25	505	PCNA	555	POLD2	605	PSMC3
6	RBM14	56	POLR2D	106	BUB1B	156	RPLP0	206	PSMB6	256	NUP93	306	PLK4	356	HJURP	406	RACGAP1	456	SFPQ	506	HMGCS1	556	CDC23
7	WDR5	57	DHDDS	107	NOL6	157	SMR3B	207	ZNF335	257	POLR1A	307	PRPF38B	357	HCFC1	407	PPAN	457	CCT6A	507	GPN1	557	SBNO1
8	NUP160	58	RBBP4	108	RSL1D1	158	PFDN6	208	IGBP1	258	DCTN6	308	NCAPD2	358	NUDT21	408	SNAPC1	458	NUP133	508	TRAPPC4	558	RFC2
9	SNRPD2	59	RANGAP1	109	MCM2	159	LAS1L	209	RPS8	259	MDN1	309	NRF1	359	NDC80	409	PSMD4	459	PSMD7	509	ERCC3	559	LSM8
10	NOL10	60	FAU	110	TRAPPC5	160	CCT3	210	SF3B1	260	SF3B2	310	PSMA6	360	SNRPB	410	NVL	460	LSM2	510	C1orf131	560	CDC123
11	SMC4	61	POLR3A	111	RPL30	161	POLD3	211	PSMD12	261	DDX49	311	CSTF1	361	SMG1	411	DYNC1H1	461	CENPK	511	MCM3	561	TAF6
12	PSMB7	62	XRCC5	112	AHCTF1	162	COPS5	212	NOB1	262	EEF1G	312	RNGTT	362	SNAPC5	412	MED30	462	RPS19	512	TNPO3	562	NLE1
13	TUBG1	63	DKC1	113	MTBP	163	EIF5	213	CHAF1B	263	TUT1	313	MAT2A	363	NSF	413	DCTN5	463	SPC24	513	NUP205	563	DDX47
14	PRPF38A	64	RPL4	114	ATP6V1A	164	UBE2M	214	ANAPC5	264	EIF2S1	314	RUVBL1	364	TBCD	414	RRN3	464	RPL18A	514	MFAP1	564	PSMA3
15	RPS10	65	PUF60	115	POLR2B	165	DNAJC8	215	EFTUD2	265	XPO1	315	MASTL	365	KRR1	415	BYSL	465	ABCE1	515	VPS28	565	CCT4
16	RPL37	66	RPA2	116	UTP15	166	KPNB1	216	NEDD1	266	EIF3H	316	CDC6	366	CDCA8	416	SMC1A	466	ABCB7	516	EIF2B2	566	POP5
17	TOMM40	67	TSG101	117	SF3B3	167	RNF113A	217	PSMD14	267	ACTR10	317	PSMD11	367	SPCS2	417	PWP2	467	RRM2	517	GPN3	567	ZMAT5
18	UBA52	68	MED8	118	USP36	168	RPL13A	218	CENPA	268	ELL	318	PMF1	368	PSMB5	418	CDC27	468	MCM4	518	SMU1	568	AAMP
19	ERH	69	ZBTB11	119	RPL36	169	GTF2F2	219	SAP30BP	269	RBM22	319	CINP	369	TOMM22	419	POLR2L	469	MED22	519	RBBP5	569	SSU72
20	CCT8	70	SART1	120	DUT	170	FCF1	220	GTF2A2	270	YKT6	320	RUVBL2	370	PRPF6	420	ATP6V0B	470	RPS16	520	RPL7	570	ALG11
21	HSPD1	71	CDC5L	121	SMG5	171	RPS2	221	RPS13	271	NUP85	321	HYOU1	371	SMC2	421	EXOSC4	471	SNW1	521	NOC4L	571	WEE1
22	NACA	72	NMD3	122	CNIH4	172	CHAF1A	222	USP39	272	GTF2E1	322	EIF4A3	372	RPL36A	422	MCM5	472	ANAPC2	522	WDR70	572	DPAGT1
23	HSPA5	73	DDX18	123	SPC25	173	SART3	223	RPL19	273	RPS15	323	EIF2B5	373	WDR46	423	SKP1	473	IPO7	523	RPS3	573	ATP6V1F
24	LYRM4	74	SNRPC	124	CTDP1	174	RPS7	224	FIP1L1	274	DHX16	324	WDR55	374	UBA2	424	NUTF2	474	CLP1	524	PSMB3	574	RRM1
25	TRRAP	75	ALG2	125	UTP20	175	PDAP1	225	PSMD6	275	ATP2A2	325	POLD1	375	TUBGCP3	425	LSM7	475	ESPL1	525	SSRP1	575	XRCC6
26	FARSB	76	RPL23A	126	YRDC	176	TIGD1	226	SRP19	276	WDR82	326	CHMP2A	376	PDRG1	426	CDC20	476	NKAP	526	LCE5A	576	RPAP1
27	TCP1	77	DDX56	127	PLK1	177	RPL35	227	RPL24	277	RPL11	327	WDR12	377	SBDS	427	CCNK	477	SUPT6H	527	RRP12	577	PAK1IP1
28	LSM3	78	PRPF4	128	DDX54	178	SEC61A1	228	EXOSC7	278	THOC2	328	RPL10A	378	SPATA5L1	428	POLR2E	478	PELP1	528	BRF2	578	SNAPC3
29	RPL31	79	KIF23	129	CDC16	179	NUS1	229	CHD4	279	LSM5	329	POLR3H	379	RABGGTB	429	IK	479	KRT8	529	DDB1	579	EEF2
30	MEPCE	80	UBTF	130	EIF2S2	180	ESF1	230	RPS25	280	TOP3A	330	DHX33	380	POLE2	430	RPLP2	480	ABCF1	530	CNOT3	580	CSE1L
31	ZNHIT2	81	VCP	131	GINS1	181	STX5	231	DDX46	281	DYNC1I2	331	CCND1	381	PRMT5	431	RCC1	481	DDX10	531	POLR2G	581	DYNLRB1
32	RPL8	82	PRPF31	132	EIF2S3	182	CDK9	232	NEDD8	282	RPS6	332	RPA1	382	POLR3B	432	TRAPPC3	482	ACTR2	532	PSMA2	582	PSMD2
33	CDC7	83	CHMP4B	133	SNRPF	183	EIF3A	233	ZMAT2	283	MCM7	333	CPSF1	383	ARMC7	433	INTS3	483	GTPBP4	533	ARL2	583	SAE1
34	RPL35A	84	UBE2I	134	RPL37A	184	HNRNPK	234	KIF11	284	WDR74	334	TOPBP1	384	DHX8	434	HSPA9	484	TOP2A	534	CKAP5	584	SRBD1
35	SF3A3	85	SF1	135	COPB1	185	POLR3C	235	NIP7	285	SLU7	335	PCBP1	385	RPL27A	435	AQR	485	RPS24	535	NCBP1	585	PRIM1
36	PHF5A	86	RPS9	136	SS18L2	186	THOC1	236	THOC7	286	CDK7	336	SF3A2	386	NUP214	436	RPS27A	486	POLR1C	536	MPHOSPH10	586	RPS20
37	RPA3	87	ZNF207	137	PSMD1	187	SRP54	237	SNAPC2	287	GRPEL1	337	PSMB4	387	RPL15	437	DBR1	487	ATP6V0C	537	EIF2B3	587	ISY1
38	UPF2	88	RBM8A	138	INTS4	188	WDR43	238	PSMC4	288	CCT5	338	SNRPD1	388	ZNF830	438	SF3B5	488	CLTC	538	USP5	588	PPWD1
39	XAB2	89	RPL13	139	RPSA	189	DTYMK	239	ANAPC1	289	TPT1	339	GUK1	389	PSMB1	439	AURKB	489	RPL18	539	UBL5	589	CPSF4
40	SNAPC4	90	RPL21	140	RPS23	190	HSPE1	240	RPL5	290	EIF1	340	ARCN1	390	PHB	440	COPZ1	490	TIPIN	540	MED11	590	SYS1
41	PABPN1	91	TXN	141	DAD1	191	RIOK2	241	GPS1	291	THOC3	341	CDC73	391	NCBP2	441	ETF1	491	RBM39	541	PDCD11	591	ATP6V1E1
42	RPL26	92	EIF4E	142	SAP18	192	PRC1	242	EIF3I	292	POLR3F	342	OGT	392	MED28	442	EIF3B	492	RPL23	542	PHB2	592	EXOSC3
43	GTF2E2	93	HNRNPC	143	ECD	193	IMP3	243	DTL	293	SUPT16H	343	ATP6V1B2	393	RPP40	443	KIN	493	CDC37	543	THAP1	593	POLR2C
44	DDX24	94	OIP5	144	RBM17	194	CRNKL1	244	LSG1	294	RBMX	344	SEC61G	394	RPS4X	444	PRPF8	494	GINS4	544	CCT7	594	SCFD1
45	RRP15	95	EIF3F	145	CENPN	195	TSR1	245	RFC3	295	CTCF	345	POLA2	395	BIRC5	445	PMPCB	495	DDX55	545	PSMC2	595	CHMP6
46	PRELID1	96	RPLP1	146	NFS1	196	FBL	246	EIF2B4	296	RPS18	346	VPS25	396	RBX1	446	DHX15	496	RAD51	546	PSMD8	596	UBA1
47	PRPF19	97	MED6	147	RPP30	197	RAE1	247	GEMIN5	297	NUBP1	347	GPN2	397	WDR77	447	SRP72	497	POLR3K	547	WDR75	597	RRS1
48	CPSF2	98	BRF1	148	RABGGTA	198	TSR2	248	COPA	298	ANAPC4	348	POLR2F	398	PES1	448	HEATR1	498	SRCAP	548	LSM6	598	COPS6
49	PSMB2	99	TXNL4A	149	OSGEP	199	U2AF2	249	C1orf109	299	TUBGCP5	349	RPL27	399	TTC27	449	RFC4	499	RNPC3	549	GINS2	599	CCT2
50	TUBGCP2	100	NUP88	150	RAN	200	RPS15A	250	RPS5	300	BUD31	350	ILF2	400	GSPT1	450	COPB2	500	CHEK1	550	DNAJC17	600	CLNS1A
