# Supplementary material for: Identification of NCAPG as an Essential Gene for Neuroblastoma Employing CRISPR-Cas9 Screening Database and Experimental Verification
Source: Int J Mol Sci. 2023 Oct 6;24(19):14946. doi: 10.3390/ijms241914946 (PMC10573393; doi:10.3390/ijms241914946)
Supplement: Supplementary file 1 [file ijms-24-14946-s001.zip › Table S2.csv]

ID	symbol
1	MCM6
2	SMC4
3	OIP5
4	MAD2L1
5	BUB1B
6	MCM2
7	SPC25
8	PLK1
9	GINS1
10	CENPN
11	LSM4
12	CHAF1A
13	CENPA
14	KIF11
15	DTL
16	RFC3
17	CDT1
18	PLK4
19	RUVBL1
20	MASTL
21	CDC6
22	POLA2
23	HJURP
24	NDC80
25	POLE2
26	BIRC5
27	NUF2
28	AURKB
29	RFC4
30	AURKA
31	CENPK
32	SPC24
33	RRM2
34	TIPIN
35	RAD51
36	CHEK1
37	PCNA
38	MCM3
39	GINS2
40	NCAPG
41	WEE1
42	RRM1
43	POLR2H
44	NOB1
45	WDR74
