# Supplementary material for: Identification of NCAPG as an Essential Gene for Neuroblastoma Employing CRISPR-Cas9 Screening Database and Experimental Verification
Source: Int J Mol Sci. 2023 Oct 6;24(19):14946. doi: 10.3390/ijms241914946 (PMC10573393; doi:10.3390/ijms241914946)
Supplement: Supplementary file 1 [file ijms-24-14946-s001.zip › Table S3.pdf]

**Table S3.** clinical characteristics of the neuroblastoma patients

| Characteristic         | Patient number (%) |
|------------------------|--------------------|
| Total                  | 40                 |
| Gender                 |                    |
| Male                   | 16(40.0)           |
| Female                 | 24(60.0)           |
| Age(months)            |                    |
| <18                    | 11(27.5)           |
| ≥18                    | 29(72.5)           |
| INSS stage             |                    |
| 1                      | 13(32.5)           |
| 2                      | 3(7.5)             |
| 3                      | 4(10.0)            |
| 4                      | 18(45.0)           |
| 4s                     | 2(5.0)             |
| COG risk               |                    |
| LR                     | 16(40.0)           |
| IR                     | 2(5.0)             |
| HR                     | 22(55.0)           |
| Bone marrow metastasis |                    |
| No                     | 24(60.0)           |
| Yes                    | 16(40.0)           |
| Distant metastasis     |                    |
| No                     | 20(50.0)           |
| Yes                    | 20(50.0)           |
| Histological type      |                    |
| Ganglioneuroblastoma   | 12(30.0)           |
| Neuroblastoma          | 28(70.0)           |
| MYCN amplification     |                    |
| No                     | 28(70.0)           |
| Yes                    | 12(30.0)           |
| Relapse                |                    |
| No                     | 22(55.0)           |
| Yes                    | 18(45.0)           |
| Follow-up              |                    |
| Alive                  | 27(67.5)           |
| Dead                   | 13(32.5)           |
